# Supplementary material
Source: PubMed Central journal article supplement (PMC3036194)
Supplement: tjp0588-5015-SD1.pdf [file tjp0588-5015-SD1.pdf]

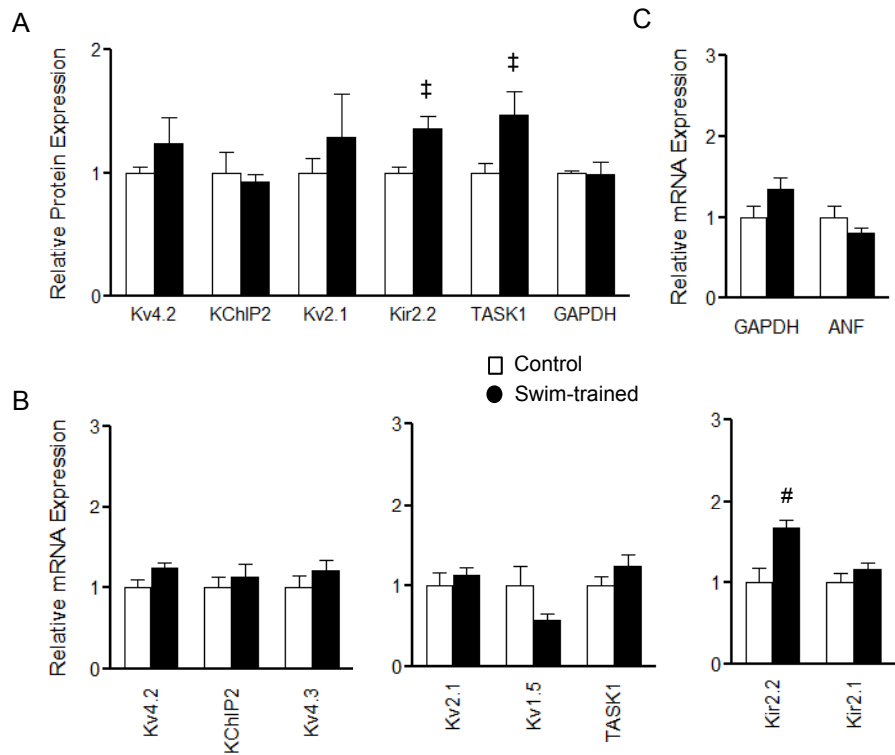

**Supplemental Figure 1.** Myocardial K<sup>+</sup> channel subunit protein and transcript expression levels in LV samples from swim-trained and control animals increase in parallel with the increase in total cellular protein/RNA..

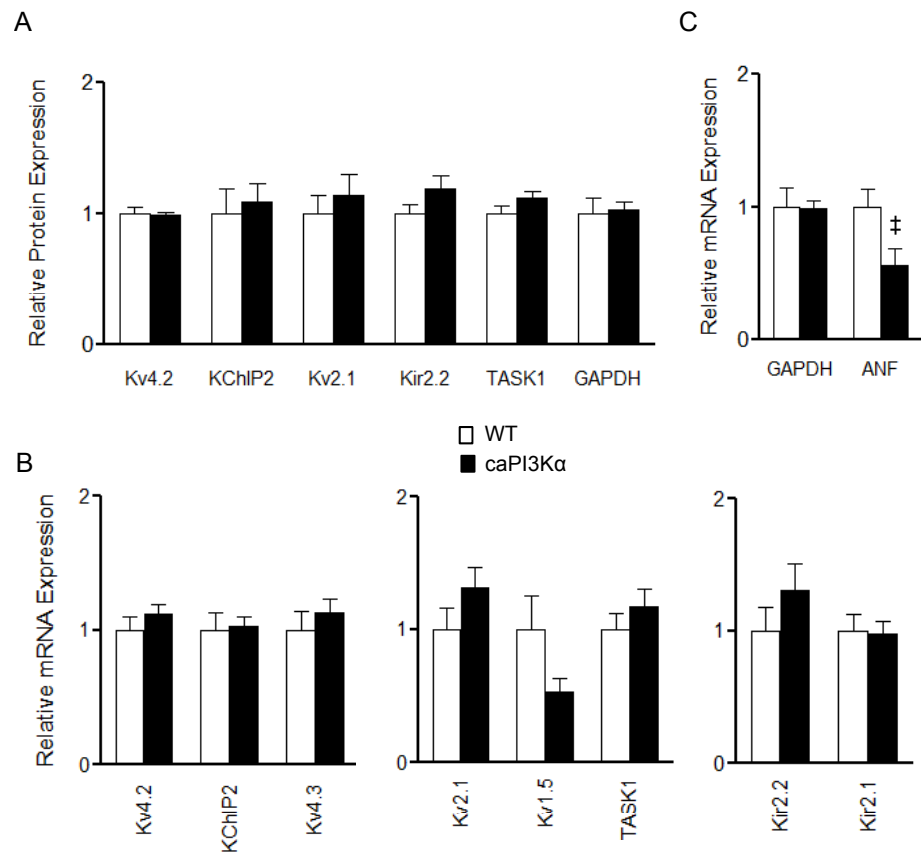

**Supplemental Figure 2.** Myocardial K<sup>+</sup> channel subunit protein and transcript expression levels in LV samples from caPI3K and WT animals increase in parallel with the increase in total cellular protein/RNA..

**Supplemental Figure 1. Myocardial K<sup>+</sup> channel subunit protein and transcript expression levels in LV samples from swim-trained and control animals increase in parallel with total cellular protein/RNA.** Protein (A) and transcript (B) expression levels of each of the K<sup>+</sup> channel subunits were measured in LV samples from swim-trained and control LV, and normalized to the total protein or total RNA respectively determined in the same sample. Values determined in swim-trained LV were then expressed relative to the controls. Mean ± SEM normalized protein (A) and transcript (B) expression levels are plotted.

**Supplemental Figure 2. Myocardial K<sup>+</sup> channel subunit protein and transcript expression levels in LV samples from caPI3K $\alpha$  and WT animals increases in parallel with total cellular protein/RNA.** Protein (A) and transcript (B) expression levels of K<sup>+</sup> channel subunits were measured in LV samples from caPI3K $\alpha$  and WT LV, and normalized to the total protein or total RNA respectively determined in the same sample. Values measured in caPI3K $\alpha$  LV were then expressed relative to WT. Mean ± SEM protein (A) and transcript (B) expression levels are plotted.
